# Supplementary material
Source: PubMed Central journal article supplement (PMC5075989)

Figure 1

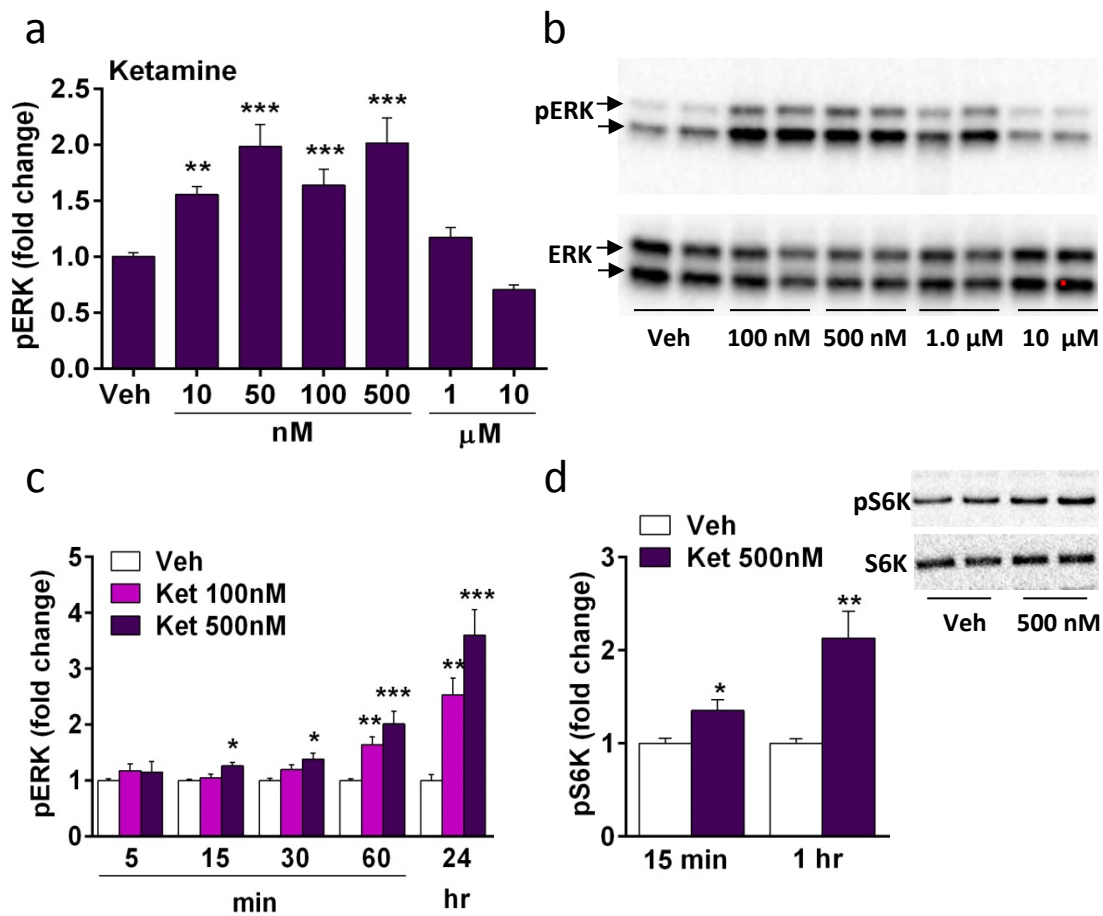

Figure 2

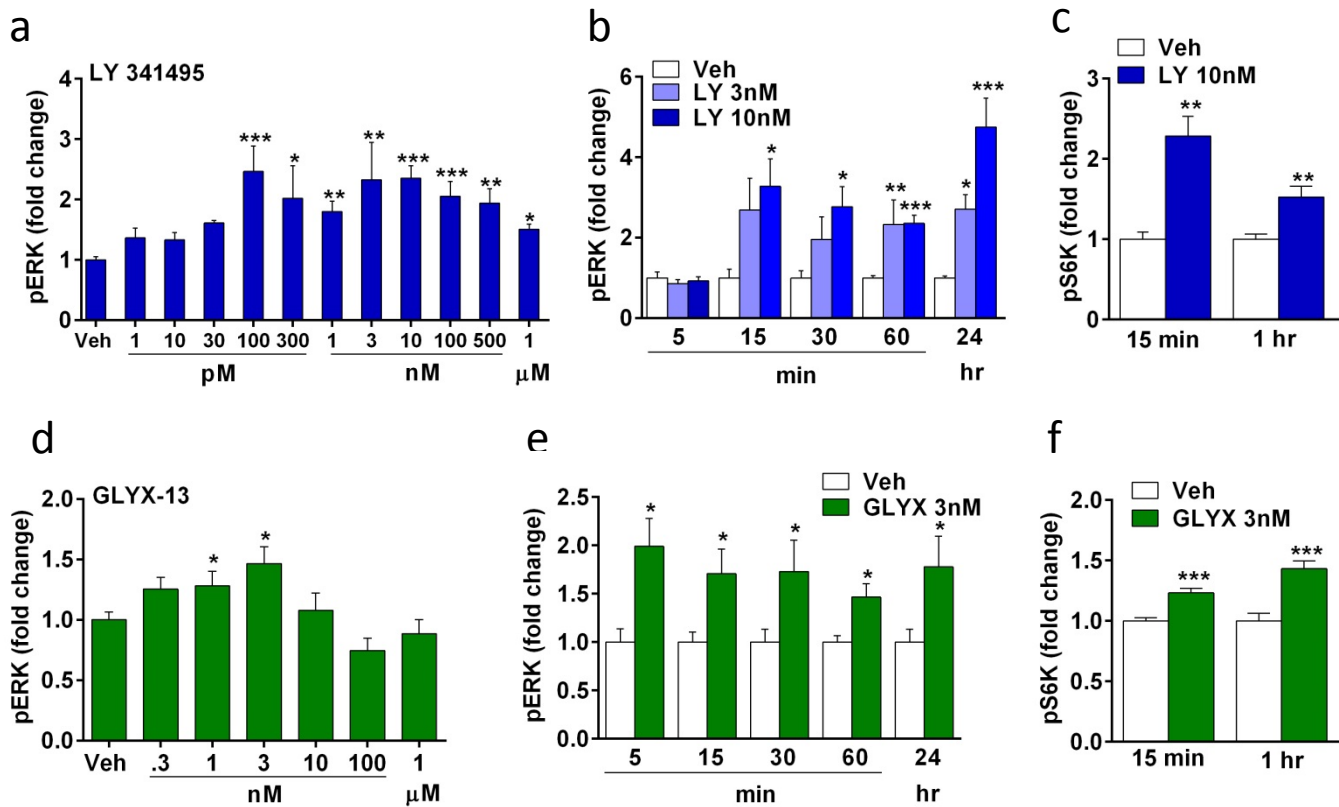

Figure 3

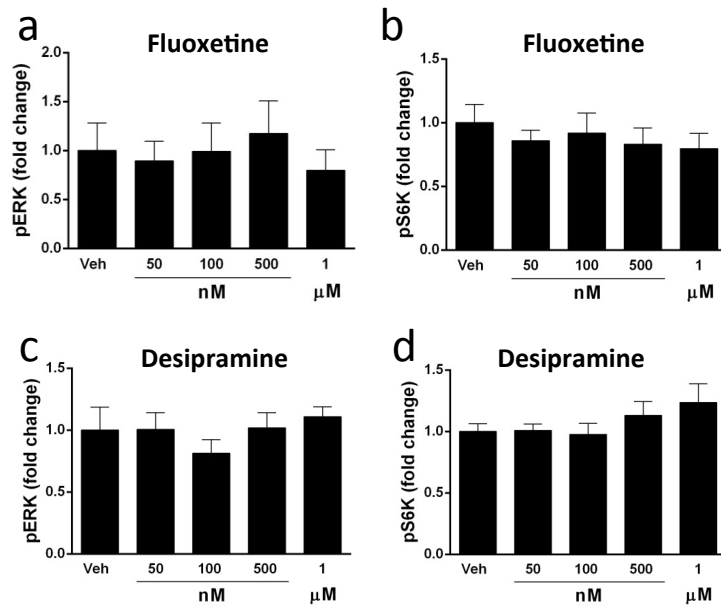

Figure 4

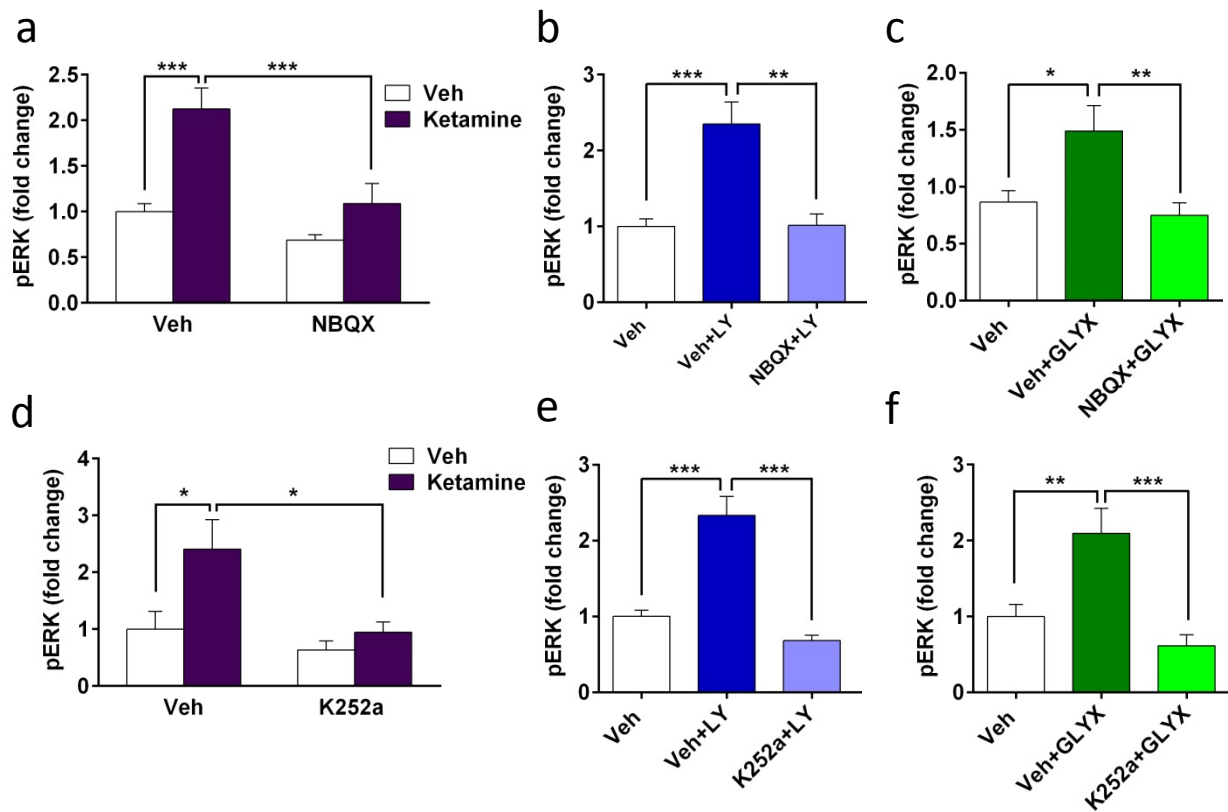

Figure 5

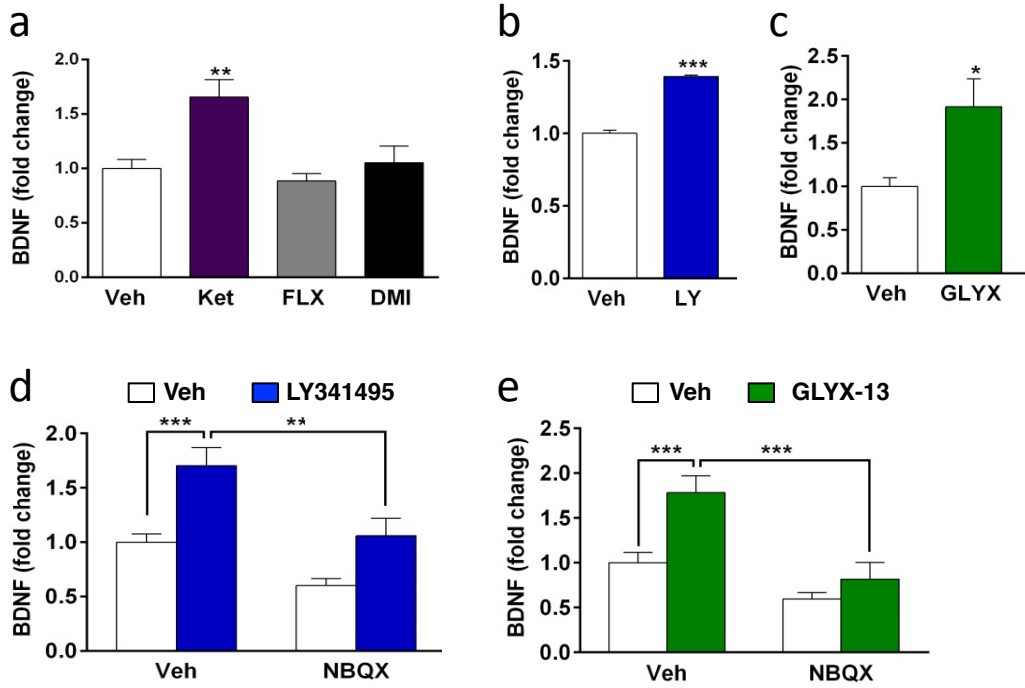

Figure 6

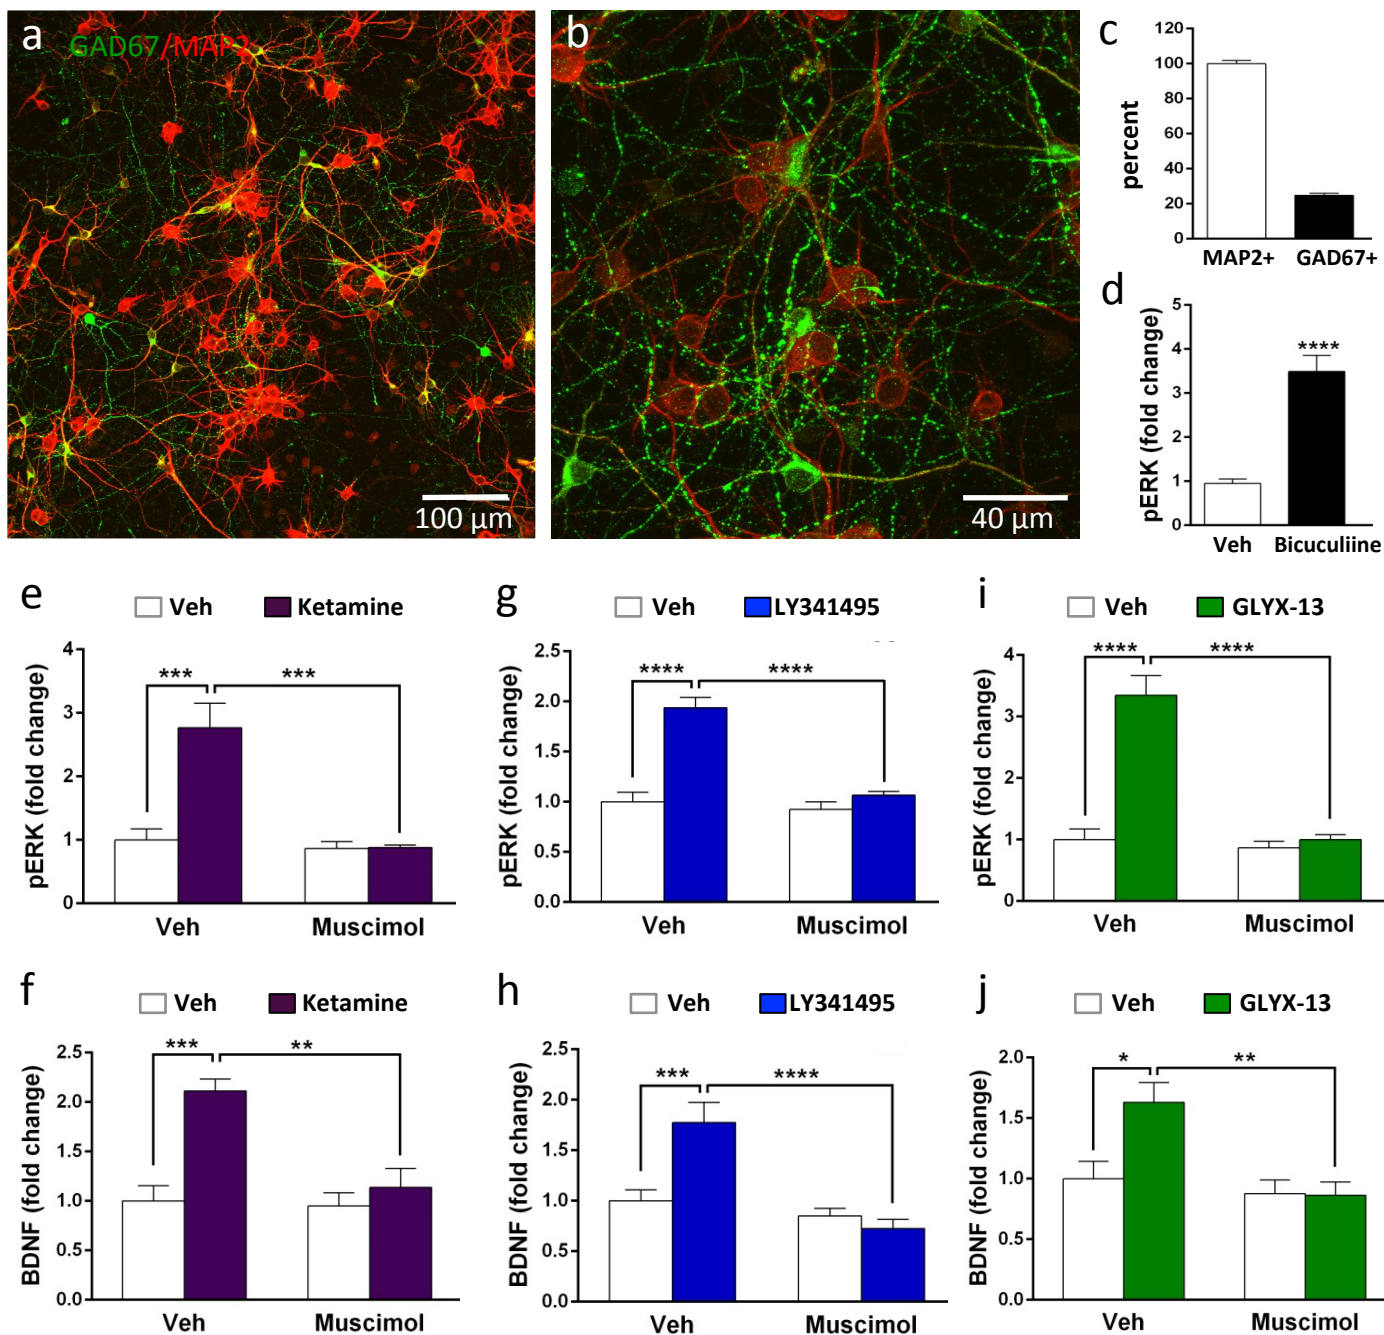

Figure 7

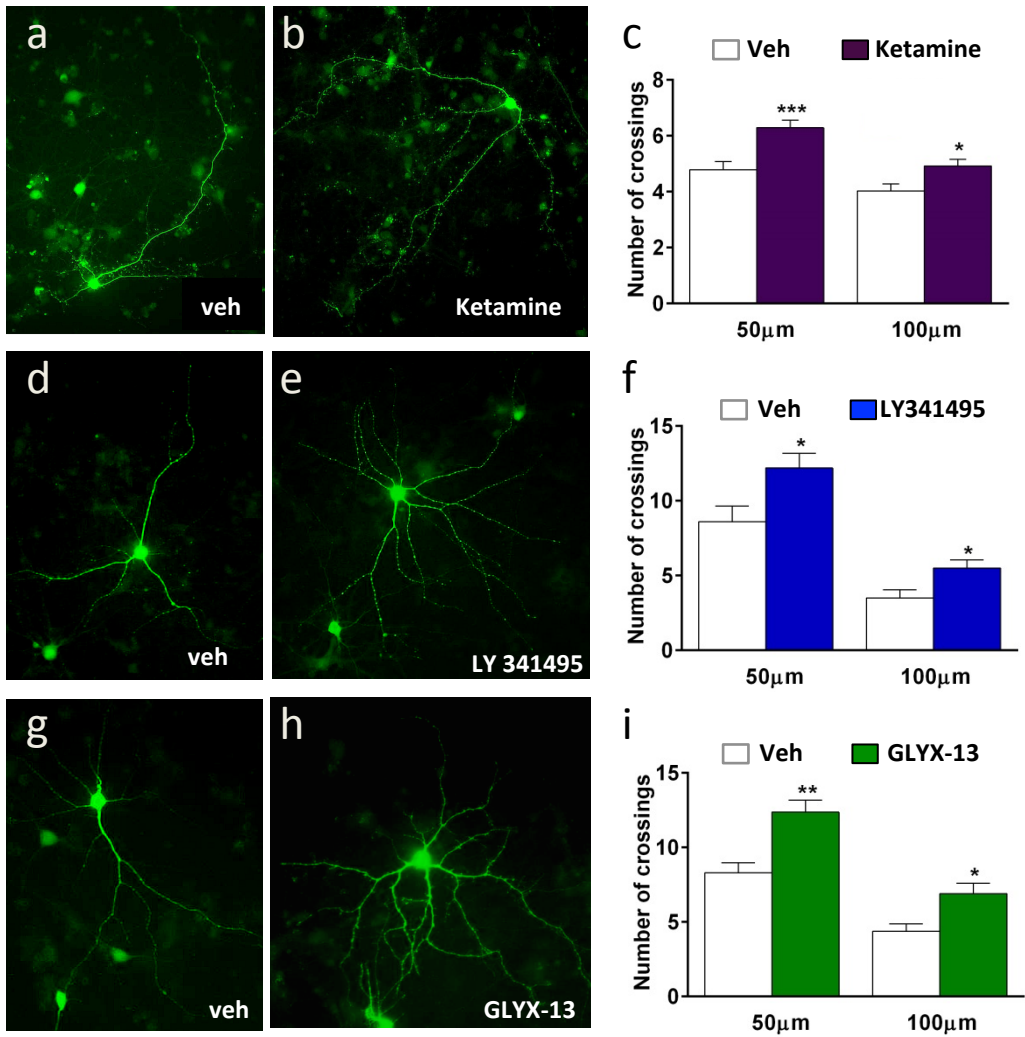

Figure 8

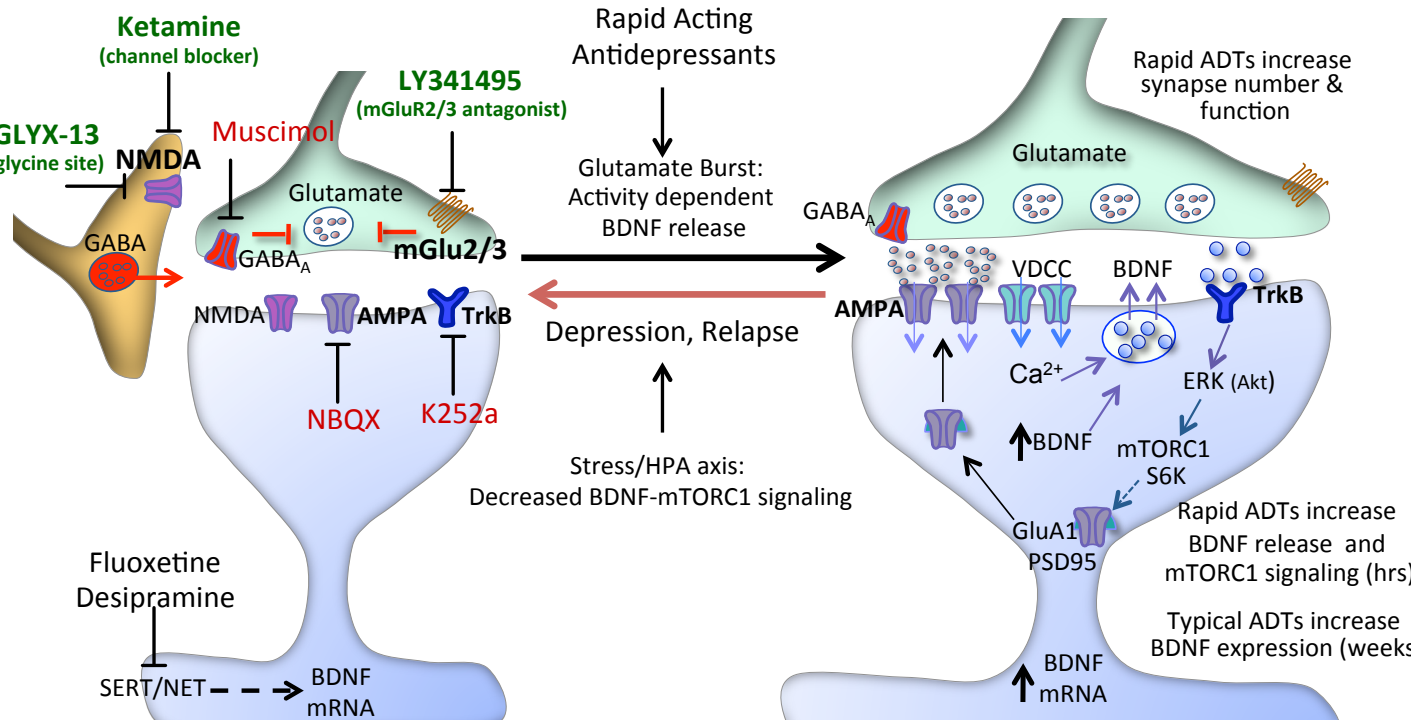

Supplement: NIHMS817867-supplement-1.pdf [file NIHMS817867-supplement-1.pdf]

# Supplemental Figure 1

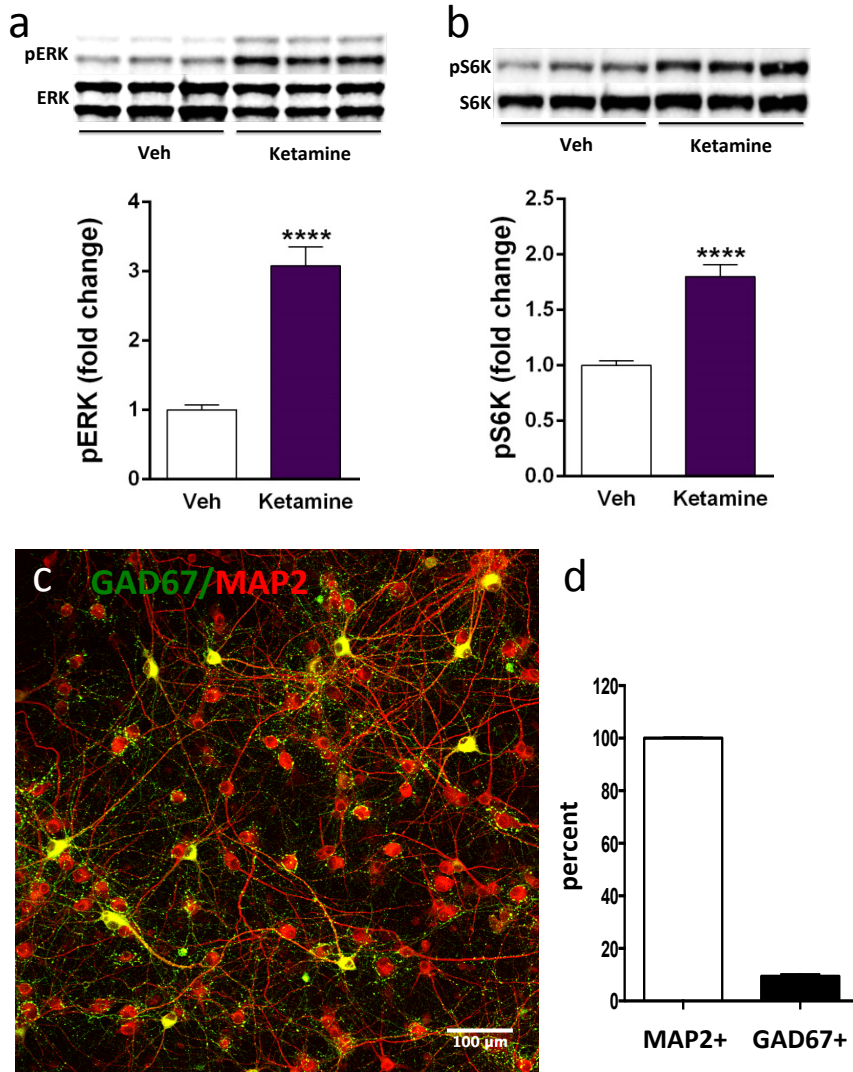

## Supplemental Figure 2

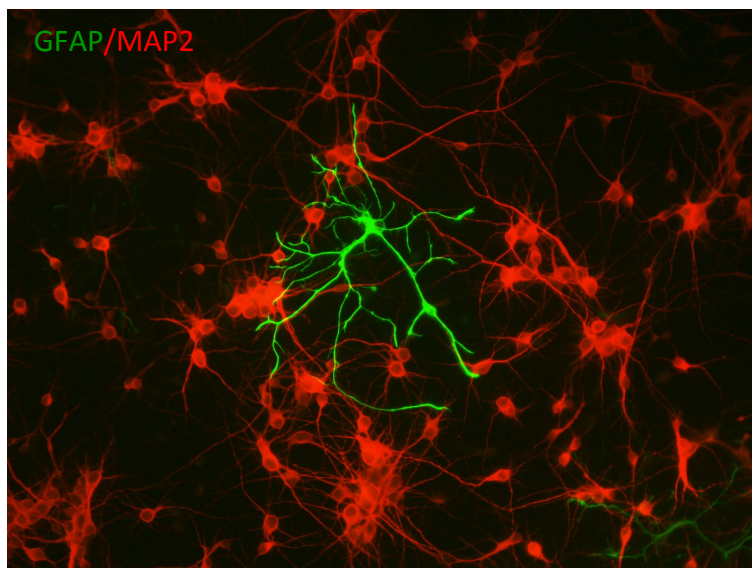

Supplement: NIHMS817867-supplement-2.pdf [file NIHMS817867-supplement-2.pdf]
